# Supplementary material for: Heteroatom coordination induces electric field polarization of single Pt sites to promote hydrogen evolution activity
Source: Royal Society of Chemistry journal article supplement (doi:10.1039/d1nr00795e), 2021-01-01
Supplement: d1nr00795e1.pdf [file d1nr00795e1.pdf]

## ***Supporting Information for***

### **Heteroatom coordination induces electric field polarization of single Pt sites to promote hydrogen evolution activity**

Xiayun Peng,<sup>†,a</sup> Haihong Bao,<sup>†,a</sup> Jiaqiang Sun,<sup>b</sup> Zhiyong Mao,<sup>\*,c</sup> Yuan Qiu,<sup>a</sup> Zhaojun Mo,<sup>\*,d</sup> Longchao Zhuo,<sup>e</sup> Shusheng Zhang,<sup>f</sup> Jun Luo,<sup>a</sup> and Xijun Liu<sup>\*,a,g</sup>

<sup>a</sup> Institute for New Energy Materials and Low-Carbon Technologies and Tianjin Key Lab for Photoelectric Materials & Devices, School of Materials Science and Engineering, Tianjin University of Technology, Tianjin 300384, China. E-mail: xjliu@tjut.edu.cn (X. J. Liu)

<sup>b</sup> State Key Laboratory of Coal Conversion, Institute of Coal Chemistry, Chinese Academy of Sciences, Taiyuan 030001, Shanxi, China.

<sup>c</sup> School of Materials Science and Engineering, Tianjin University of Technology, Tianjin 300384, China. E-mail: mzhy1984@163.com (Z. Y. Mao)

<sup>d</sup> Ganjiang Innovation Academy, Chinese Academy of Sciences, Jiangxi 341000, China. E-mail: mozhaojun@gia.cas.cn (Z. J. Mo)

<sup>e</sup> School of Materials Science and Engineering, Xi'an University of Technology, Xi'an 710048, China.

<sup>f</sup> College of Chemistry, Zhengzhou University, Zhengzhou 450000, China.

<sup>g</sup> Key Laboratory of Civil Aviation Thermal Hazards Prevention and Emergency Response, Civil Aviation University of China, Tianjin 300300, China.

† Authors contributed equally to this work.

## **Experimental section**

### **Synthesis of Pt-SA/MXene**

MXene was prepared according to our previous work (Small 2020, 16, 2002888). The Pt-SA/MXene catalyst could be easily obtained via ultrasonizing the mixture solution of MXene and Pt precursor. In typically, 200  $\mu\text{L}$  of 6  $\text{mg ml}^{-1}$  freshly prepared chloroplatinic acid solution was added to 100 ml MXene suspension solution (1  $\text{mg ml}^{-1}$ ) solution. The mixture was vigorously ultrasonicated for 1 h under a flowing Ar atmosphere in an ice bath to minimize oxidation. After that, Pt-SA/MXene was obtained by centrifuging and freeze-drying.

### **Synthesis of Pt-NP/MXene**

For the synthesis of Pt-NP/MXene, 500  $\mu\text{L}$  of 6  $\text{mg ml}^{-1}$  freshly prepared chloroplatinic acid solution was adding into 100 ml of MXene suspension solution (1  $\text{mg ml}^{-1}$ ) with electromagnetic stirring for 30 min. Then, 24 mg of sodium borohydride was quickly added into the above resultant mixture under vigorous stirring for 2 h at 0  $^{\circ}\text{C}$  using an ice bath to maintain the temperature for the prevention of Pt nanoparticle aggregations. Subsequently, the resulting solution was centrifuged and washed with deionized water. Finally, the Pt-NP/MXene composite was obtained by freeze-drying.

### **Materials characterization**

X-ray diffraction (XRD) was conducted with an X-ray diffractometer (Rigaku SmartLab 9 kW) with Cu  $\text{K}\alpha$  radiation ( $\lambda = 0.154598 \text{ nm}$ ) at a scan rate of  $10^{\circ} \text{ min}^{-1}$  from  $3^{\circ}$  to  $70^{\circ}$ . The morphology and elemental composition were carried out by transmission electron microscopy (TEM) and energy-dispersive X-ray spectroscopy (EDX) mappings using FEI Talos F200X instruments. Atomic-resolution high-angle annular dark-field scanning transmission electron microscopy (HAADF-STEM) images were obtained by using a Titan Themis 60-300 STEM equipment equipped with a spherical probe aberration corrector. X-ray photoelectron spectrometry (XPS) characterizations were performed on the Thermo Scientific Al  $\text{K}\alpha$  XPS system

(ESCALAB250Xi), and the binding energies were calibrated by setting the measured binding energy of C 1s, 284.8 eV. ICP-OES analysis was conducted on a Thermo iCAP RQ instrument. The elemental analysis was performed by an elemental analyzer (Vario EL cube).

### **XAFS measurements**

XAFS spectra were obtained at the 1W1B station in BSRF (Beijing Synchrotron Radiation Facility, China) operating at 2.5 GeV with a maximum current of 250 mA. XAFS measurements at the Pt L<sub>3</sub>-edge were performed in the fluorescence mode using a Lytle detector. Athena and Artemis codes were used to extract data and fit profiles.

### **XAFS data analysis**

The acquired EXAFS data were processed with the ATHENA package software. The  $k^3$ -weighted  $\chi(k)$  data in the  $k$ -space ranging from 3.0 to 11.0 Å<sup>-1</sup> were Fourier-transformed to real ( $R$ ) space to separate the EXAFS contributions from different coordination shells. The EXAFS data fitting in the  $R$  range of (1.1, 3.0) Å was carried out by using the ARTEMIS software. The structural parameters of bond distance ( $R$ ), coordination numbers ( $N$ ), and the Debye-Waller factor ( $\sigma^2$ ) were treated adjustable during the fitting process.

### **Electrochemical tests**

Electrochemical measurements were performed with an electrochemical workstation (CHI 760C, CH Instruments Inc.) in 1 M KOH aqueous solution using a three-electrode configuration. An Ag/AgCl electrode and carbon rod were used as the reference and counter electrode, respectively. The catalyst ink was prepared by mixing 6 mg of catalyst powder, 0.5 mL of Nafion (0.05 wt.%) solution, and 0.5 mL of absolute ethyl alcohol. The mixed solution was sonicated for 1 h to form homogeneous catalytic ink. Then, the working electrode was prepared by dropping 20 μL of the catalyst ink on the glassy carbon electrode. HER polarization curves were achieved at a potential sweep rate of 10 mV s<sup>-1</sup>. The electrochemical double-layer

capacitance was probed by cyclic voltammetry (CV) at non-faradaic potentials as another way to reckon the efficient electrochemical active area of HER. Current-time responses were monitored by chronoamperometric measurements for 27 h.

### Computational details

All the DFT calculations were performed using the VASP package with VASPKIT code for post-processing the calculated data. Generalized gradient approximation (GGA) with the Perdew-Burke-Ernzerhof (PBE) functional is employed to treat the exchange-correlation energy. The interaction between core and valence electrons was described by the projected augmented wave (PAW) basis set. A converged cutoff was set to 400 eV. In geometry optimizations, the force convergence standard was set below 0.01 eV Å<sup>-1</sup>. The 3 × 3 × 1 Monkhorst–Pack k-point mesh was used for each Pt-SA/MXene and Pt (111) slab optimization. The bottom two layers were fixed to implement the free energy calculation of each intermediate. A 15 Å vacuum layer was constructed along the z-axis for each model. Contributions of zero-point energies (ZPE), enthalpy, and entropy were considered and calculated. The calculation details of the Gibbs free energy change ( $\Delta G$ ) were expressed as follows:

$$\Delta G = \Delta E + \Delta E_{ZPE} + \int C_p dT - T\Delta S$$

where  $\Delta E$  is the electronic energy difference between the free-standing and the adsorption states of the intermediates;  $\int C_p dT$  is the enthalpic temperature correction.  $\Delta E_{ZPE}$  and  $\Delta S$  is the corrections of zero-point energy and variation of entropy, respectively.

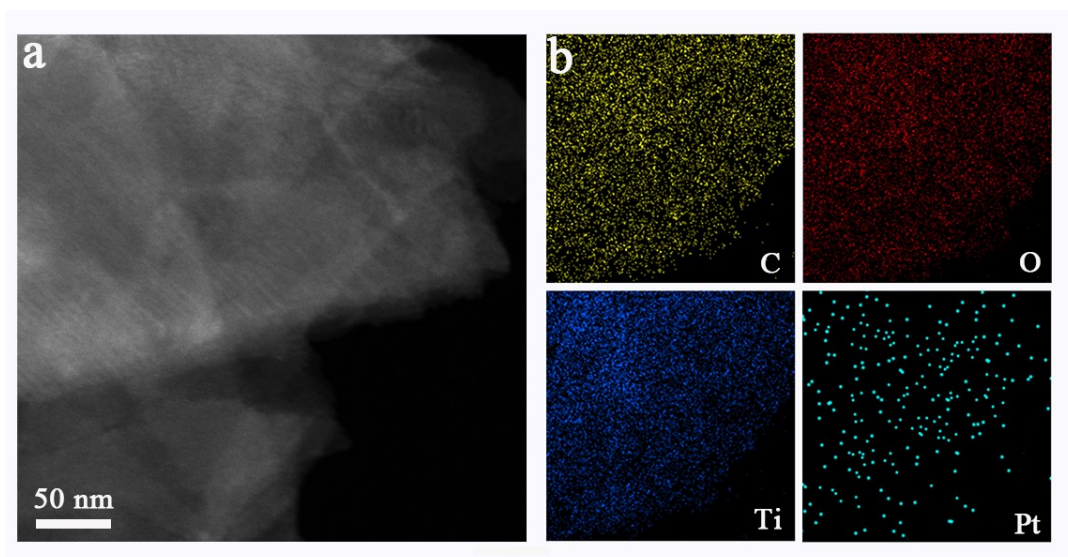

**Figure S1.** The EDX elemental mappings of Pt-SA/MXene. (a) HAADF-STEM image. (b) The EDX elemental mapping images.

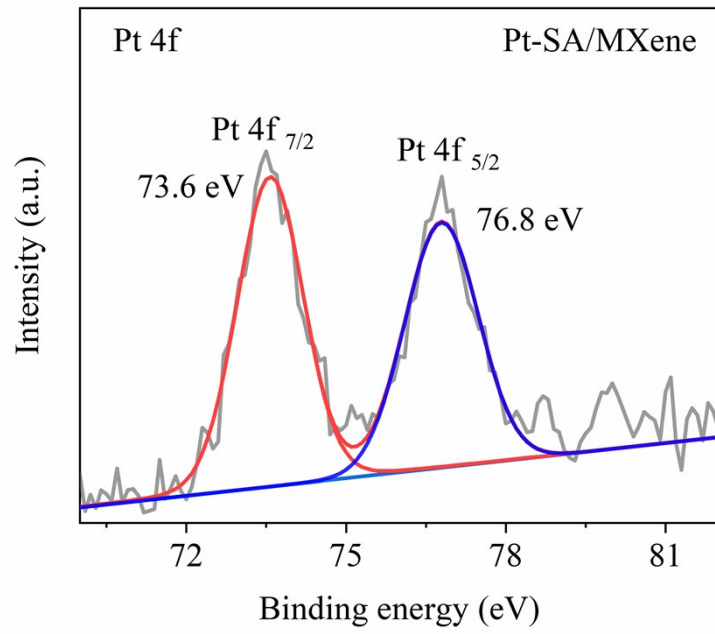

**Figure S2.** High-resolution XPS of Pt 4f in the Pt-SA/MXene sample.

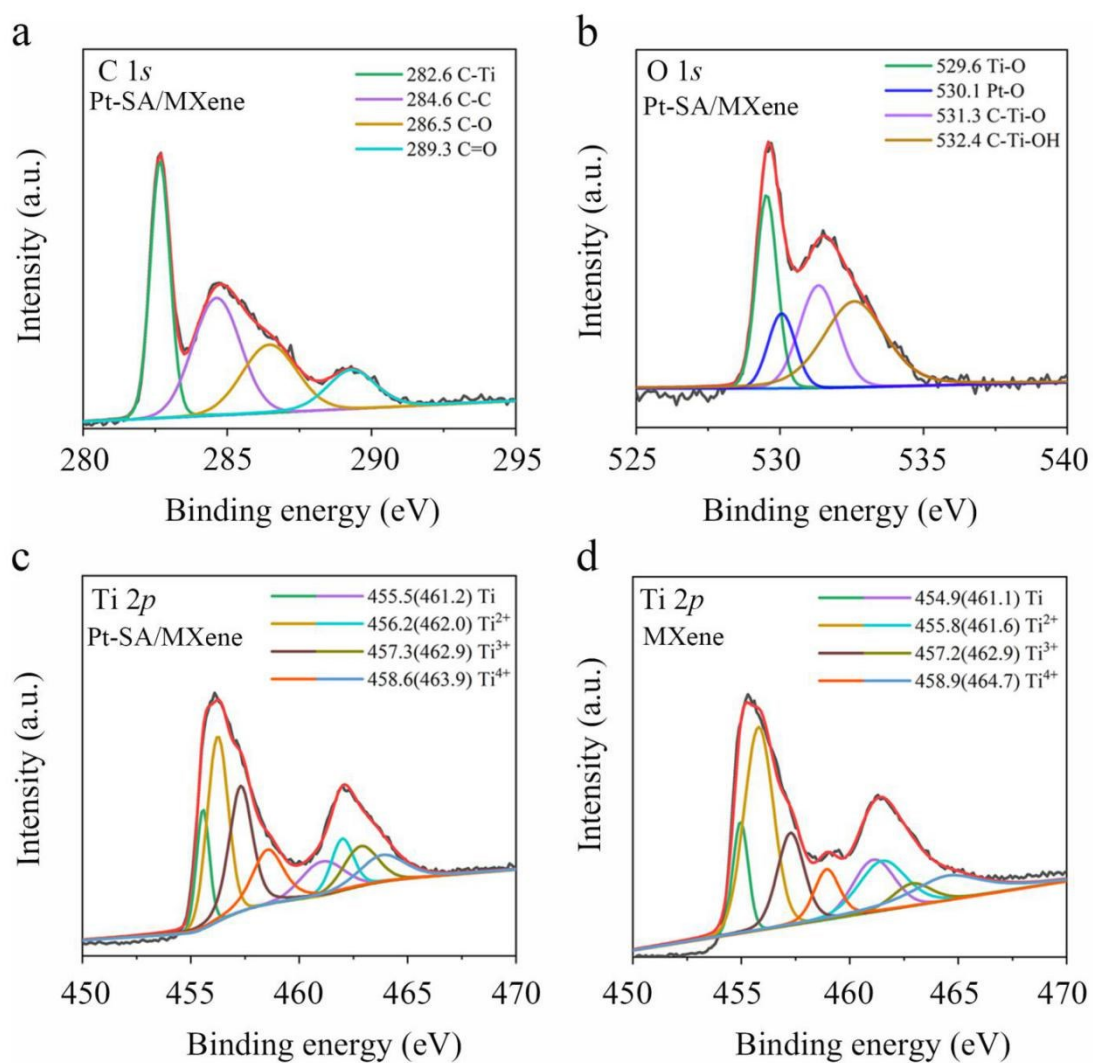

**Figure S3.** XPS results of Pt-SA/MXene and MXene. (a-C) C 1s, O 1s and Ti 2p spectra of Pt-SA/MXene, (d) Ti 2p spectra of MXene.

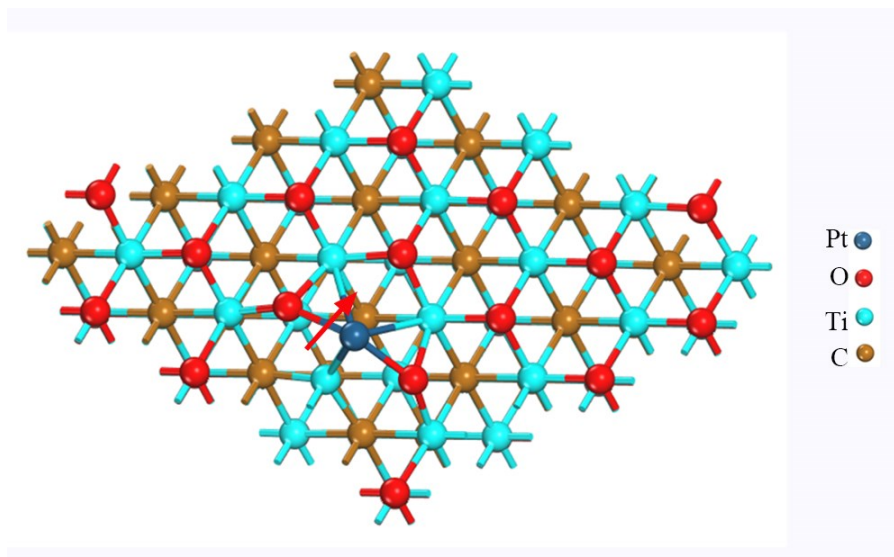

**Figure S4.** The top-view atomic structure of the Pt-SA/MXene sample.



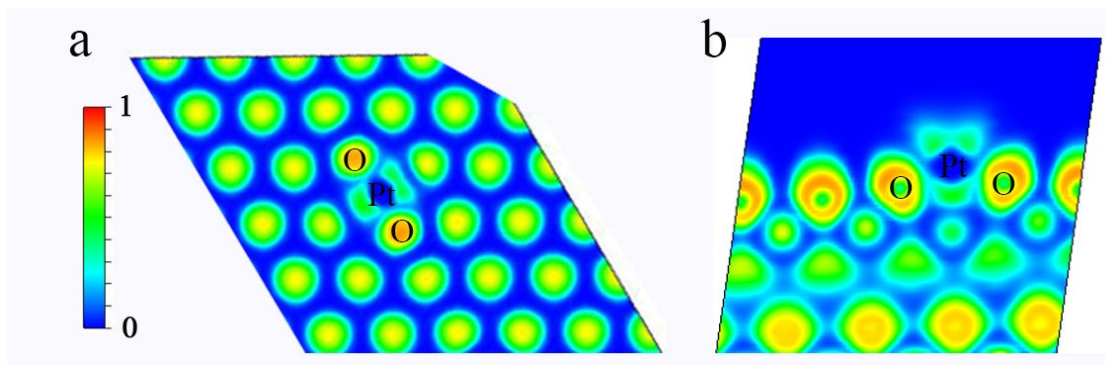

**Figure S5.** Electron localization function the Pt-SA/MXene sample (a) top view and (b) side view.

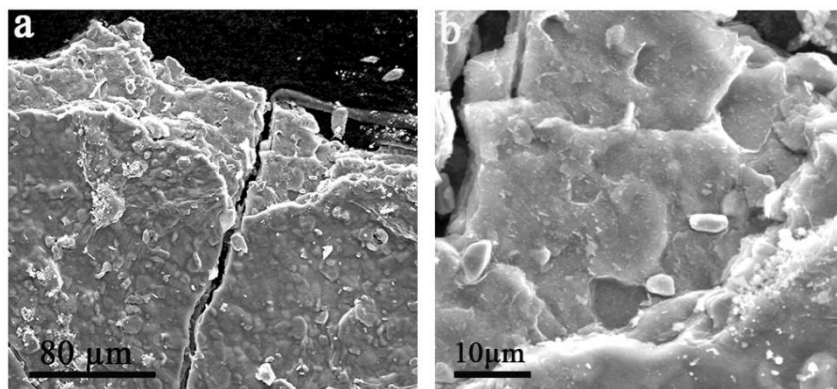

**Figure S6.** The SEM image of the Pt-NP/MXene sample.

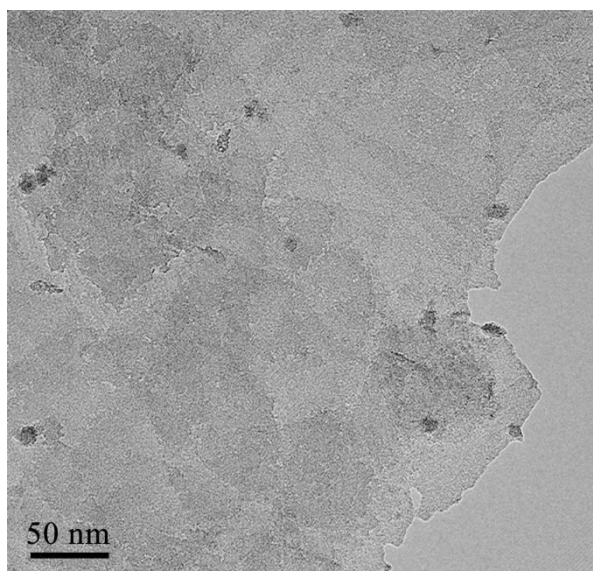

**Figure S7.** The TEM image of the Pt-NP/MXene sample. The Pt nanoparticles are uniformly dispersed on ultrathin MXene nanosheets.

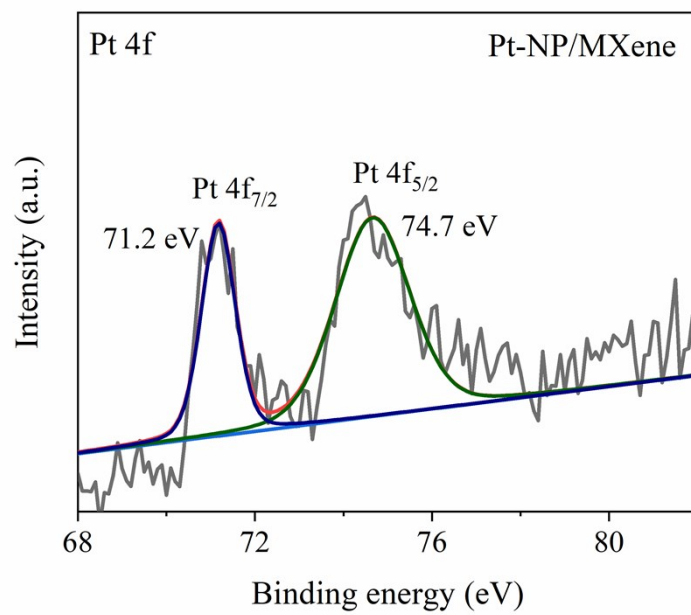

**Figure S8.** The High-resolution XPS of Pt 4f in the Pt-NP/MXene sample. The Pt 4f peaks at 71.2eV and 74.7 eV indicate the Pt<sup>0</sup> valence value state of Pt in the Pt-NP/MXene sample.<sup>20</sup>

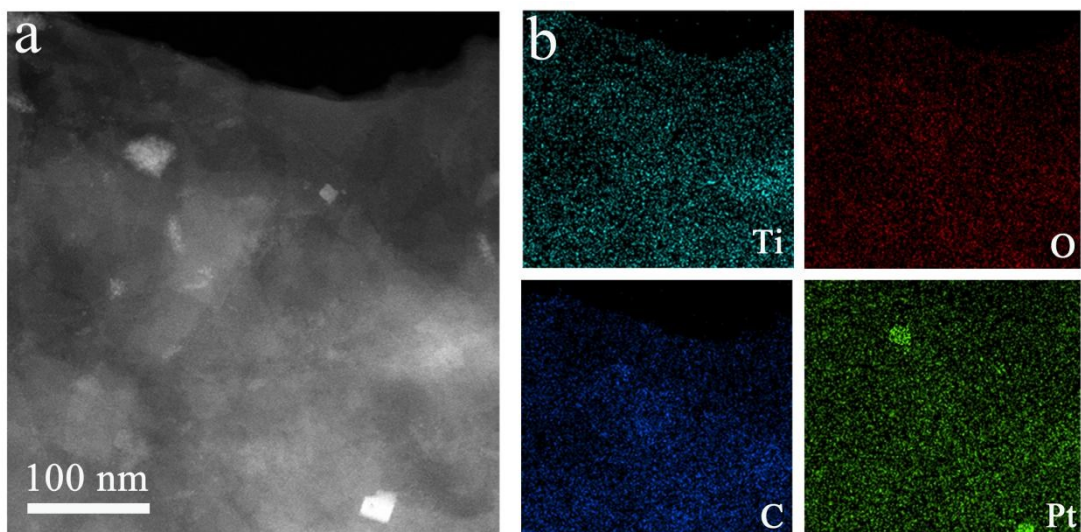

**Figure S9.** The EDX elemental mappings of Pt-NP/MXene. (a) HAADF-STEM image. (b) The EDX elemental mapping images. It indicated the appearance of Pt nanoparticles and the homogeneous dispersion of the Ti, C, and O elements.

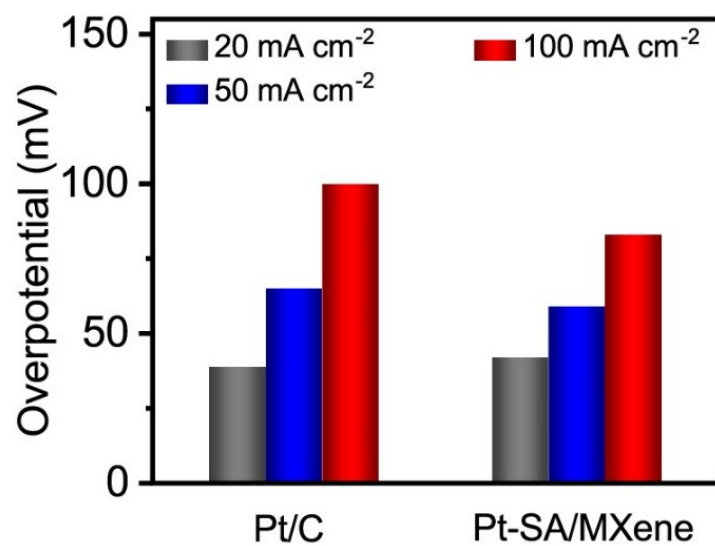

**Figure S10.** The overpotential comparison diagram of Pt-SA/MXene and Pt/C at different current densities.

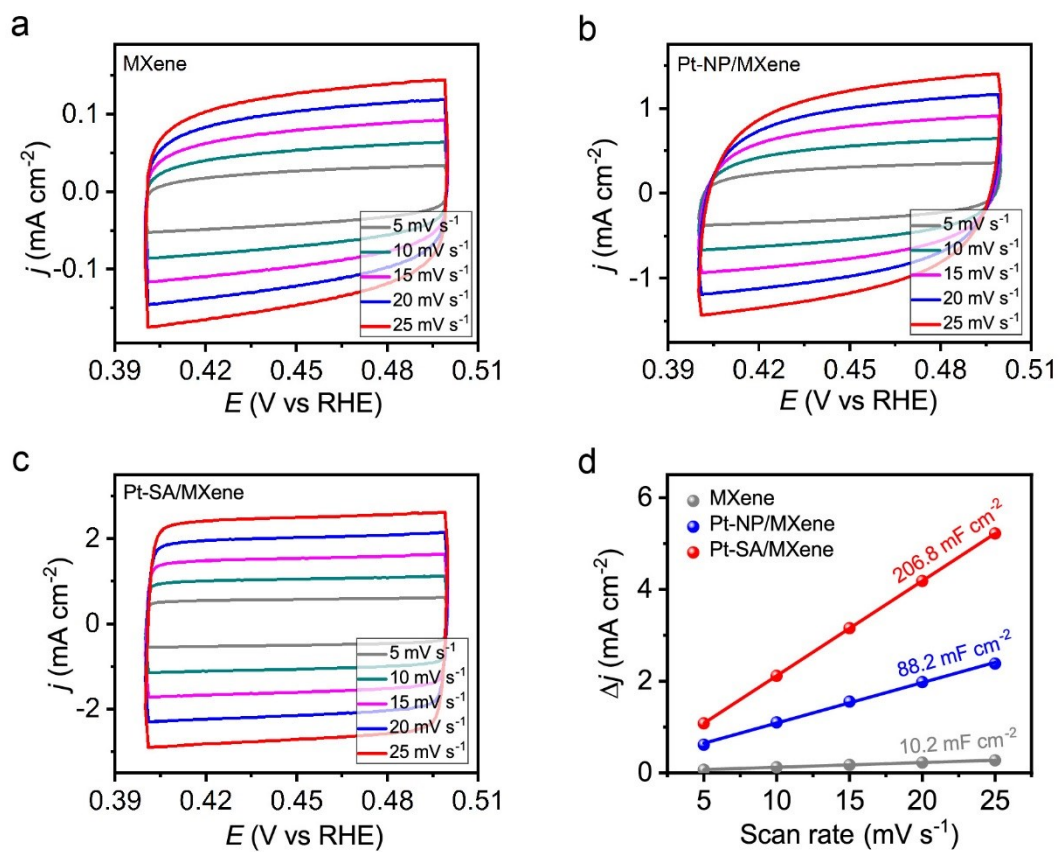

**Figure S11.** The cyclic voltammograms of (a) MXene, (b) Pt-NP/MXene, and (c) Pt-SA/MXene electrodes with various scan rates. (d) The capacitance current densities as a function of scan rate.

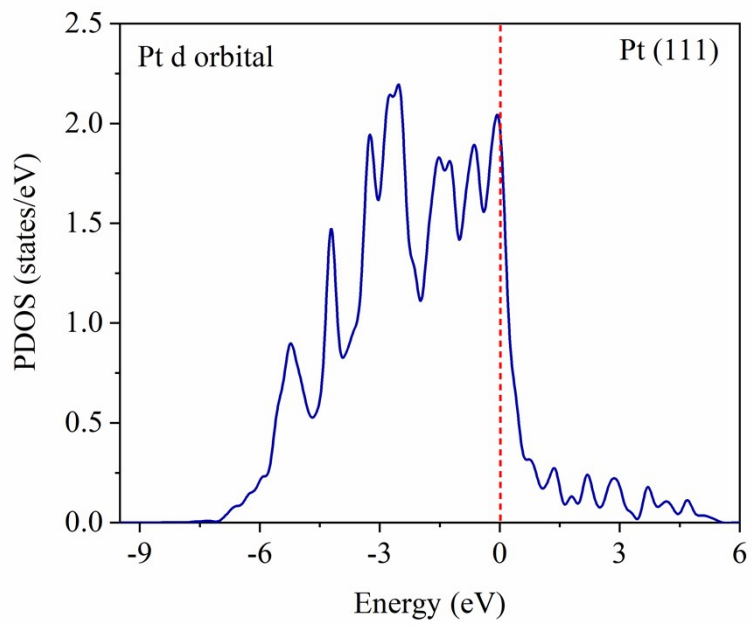

**Figure S12.** The projected density of states (PDOS) for the Pt-SA/MXene sample.



**Table S1.** EXAFS fitting parameter for Pt L<sub>3</sub>-edge of Pt-SA/MXene.

| Sample      | Main shell | Atom | <i>N</i> | <i>R</i> (Å) | $\sigma^2$ (Å <sup>2</sup> ) | $\Delta E_0$ (eV) | <i>R</i> factor |
|-------------|------------|------|----------|--------------|------------------------------|-------------------|-----------------|
| Pt-SA/MXene | 1st        | O    | 2.2±0.5  | 2.01         | 0.005                        | 5.8±0.9           | 0.01            |
|             | 2st        | Ti   | 1.1±0.6  | 2.44         | 0.01                         | 5.8±0.9           | 0.01            |
|             | 3st        | Ti   | 1.7±1.0  | 2.78         | 0.01                         | 5.8±0.9           | 0.01            |

$S_0^2 = 0.71$ ,  $S_0^2$  the amplitude reduction factor derived from fitting the Pt foil; *N*, the coordination number; *R*, interatomic distance;  $\sigma^2$ , Debye-Waller factor;  $\Delta E_0$ , edge-energy shift (accounts for the difference between the zero kinetic energy value of the sample and that of the theoretical model). *R* factor, the goodness of the fitting. The fitting window is from 1.1–3.0 here.

**Table S2.** The HER activity of the Pt-SA/MXene compared with other recently reported single-atom catalysts in alkaline.

| Catalyst                               | Electrolyte | ICP<br>(wt.%) | Overpotential<br>(mV) | Tafel slopes<br>(mV dec <sup>-1</sup> ) | Mass loading<br>(mg cm <sup>-2</sup> ) | References                                 |
|----------------------------------------|-------------|---------------|-----------------------|-----------------------------------------|----------------------------------------|--------------------------------------------|
| Pt-SA/MXene                            | 1.0 KOH     | 1.01          | 33                    | 43.9                                    | 0.2                                    | This work                                  |
| Pt <sub>1</sub> /N-C                   | 1.0 KOH     | 2.5           | 46                    | 36.8                                    | 0.25                                   | Nat.Commun. 2020, 11, 1029                 |
| Ru-NC                                  | 1.0 KOH     | -             | 12                    | 24.0                                    | 0.2                                    | Nat. Commun. 2019, 10, 631                 |
| ECM@Ru                                 | 1.0 KOH     | 0.68          | 83                    | 59                                      | 3.0                                    | Adv. Energy Mater. 2020, 10,<br>2000882    |
| W-SAC                                  | 0.1 KOH     | 1.21          | 85                    | 53.0                                    | 0.24                                   | Adv. Mater. 2018, 30, 1800396              |
| NiSA-MoS <sub>2</sub>                  | 1.0 KOH     | 2.0           | 98                    | 75                                      | -                                      | Nano Energy 2018, 53, 458                  |
| SA-Ru-MoS <sub>2</sub>                 | 1.0 KOH     | 5             | 76.0                  | 21                                      | 0.28                                   | Small Methods 2019, 3, 1900653             |
| Ni <sub>5</sub> P <sub>4</sub> -Ru     | 1.0 KOH     | 3.83          | 54                    | 52                                      | 0.142                                  | Adv. Mater. 2020, 5, 1906972               |
| Pt <sub>1</sub> /MoO <sub>3-x</sub> /C | 1.0 KOH     | 2             | 23.3                  | 28.8                                    | 0.10                                   | ChemCatChem DOI:<br>10.1002/cctc.201701777 |
| W-CoP                                  | 1.0 KOH     | -             | 40                    | 47.0                                    | -                                      | ACS Sustainable Chem. Eng. 2020, 8,        |

|                             |              |      |    |     |      |                                        |
|-----------------------------|--------------|------|----|-----|------|----------------------------------------|
|                             | 14825-14832. |      |    |     |      |                                        |
| Pt/np-Co <sub>0.85</sub> Se | 1.0 KOH      | 1.03 | 55 | 35  | 2.04 | Nat. Commun. 2019, 10, 1743.           |
| Ru-MoS <sub>2</sub> /CC     | 1.0 KOH      | 0.37 | 41 | 114 | 0.23 | Appl. Catal. B: Environ. 2019, 249, 91 |

**Table S3.** The calculated Bader charge  $\delta$  over Pt in Pt foil, PtO<sub>2</sub> and Pt-SA/MXene in the unit of e. Positive  $\delta$  means an oxidized state.

| Pt-SA/MXene | Pt foil | PtO <sub>2</sub> |
|-------------|---------|------------------|
| 0.17        | 0.00    | 1.41             |
